# Supplementary material
Source: PubMed Central journal article supplement (PMC4199827)
Supplement: NIHMS630057-supplement-O_Reilly_mHealth_Review_supplement.pdf [file NIHMS630057-supplement-O_Reilly_mHealth_Review_supplement.pdf]

# Current mHealth Technologies for Physical Activity Assessment and Promotion

Gillian A. O'Reilly, BS, Donna Spruijt-Metz, PhD

## Appendix A

### Characteristics of all included articles

| Study                        | N  | Sample characteristics                                                                                                                                  | Study characteristics                                                                                                                                                                            | Mobile technology use                                                                                                                                                                                                                                                                                                                                                                                                              | PA measurement                                                                      | Theoretic basis | Main outcomes                                                                                                                                                 | Findings                                                                                                                                                                                                                     | Study quality |
|------------------------------|----|---------------------------------------------------------------------------------------------------------------------------------------------------------|--------------------------------------------------------------------------------------------------------------------------------------------------------------------------------------------------|------------------------------------------------------------------------------------------------------------------------------------------------------------------------------------------------------------------------------------------------------------------------------------------------------------------------------------------------------------------------------------------------------------------------------------|-------------------------------------------------------------------------------------|-----------------|---------------------------------------------------------------------------------------------------------------------------------------------------------------|------------------------------------------------------------------------------------------------------------------------------------------------------------------------------------------------------------------------------|---------------|
| Anderson (2007) <sup>1</sup> | 9  | Age, years, M±SD: Mean age not reported; range: 19–54<br>Female: 55.6%<br>Ethnicity: not reported<br>Mean BMI±SD: not reported<br>Country: not reported | Design: quasi-experimental, short-term study of app prototype<br>Purpose: assess Shakra mobile phone app usability and user response and attitudes toward the app among adults<br>Length: 5 days | Shakra mobile phone app uses Artificial Neural Network to estimate participant's activity level; app uses social networking by sharing participants' activity information with other participants in order to promote sharing and comparison of PA data among peers and motivate individuals to be active; animated representation of user's current PA mode runs continuously on main screen of app to provide real-time feedback | Objective: activity sensing by the Shakra app<br>Subjective: self-reported PA diary | Not reported    | Participants' experience with the PA tracking and PA data-sharing features of the Shakra app; impact of PA awareness gained by app on motivation to be active | 1. The Shakra app was found to be reliable and stable<br><br>2. All participants reported the app was easy to use<br><br>3. Participants reported the app provided them with an increased awareness of their activity levels | Weak          |
| Bexelius (2010) <sup>2</sup> | 22 | Age, years, M±SD: 35.1±8.3<br>Female: 100%<br>Ethnicity: not reported<br>Mean BMI±SD: 23.7 ± 3.8<br>Country: Sweden                                     | Design: quasi-experimental<br>Purpose: determine feasibility of using Java-based app for repeated PA measurements                                                                                | Java-based mobile phone app with two PA questions answered through the app daily; text messages sent to remind about answering PA questions                                                                                                                                                                                                                                                                                        | Objective: Total EE measured by doubly labeled water<br>Subjective: Java-based      | Not reported    | Agreement between EE estimates from Java-based app and doubly labeled water and indirect calorimetry; feasibility of Java-based app for PA                    | 1. Mean difference between estimated PA levels from Java-based mobile questionnaire and doubly labeled water was small (0.014) and had                                                                                       | Strong        |

| study                        | N  | Sample characteristics                                                                                                                                  | Study characteristics                                                                                                                                                       | Mobile technology use                                                                                                                                                                                                                                                                                                                                                                                                                                                                                                                                                                                                                                                                                          | PA measurement                                                                                                                                                                                       | Theoretic basis | Main outcomes                                                                                               | Findings                                                                                                                                                                                                                                                                                                                                                                                                                                        | Study quality |
|------------------------------|----|---------------------------------------------------------------------------------------------------------------------------------------------------------|-----------------------------------------------------------------------------------------------------------------------------------------------------------------------------|----------------------------------------------------------------------------------------------------------------------------------------------------------------------------------------------------------------------------------------------------------------------------------------------------------------------------------------------------------------------------------------------------------------------------------------------------------------------------------------------------------------------------------------------------------------------------------------------------------------------------------------------------------------------------------------------------------------|------------------------------------------------------------------------------------------------------------------------------------------------------------------------------------------------------|-----------------|-------------------------------------------------------------------------------------------------------------|-------------------------------------------------------------------------------------------------------------------------------------------------------------------------------------------------------------------------------------------------------------------------------------------------------------------------------------------------------------------------------------------------------------------------------------------------|---------------|
|                              |    |                                                                                                                                                         | Length: 14 days                                                                                                                                                             |                                                                                                                                                                                                                                                                                                                                                                                                                                                                                                                                                                                                                                                                                                                | questionnaires and daily paper-based questionnaires                                                                                                                                                  |                 | data collection                                                                                             | narrow limits of agreement (2SD = 0.30);<br><br>2. Findings support feasibility                                                                                                                                                                                                                                                                                                                                                                 |               |
| Buttussi (2010) <sup>3</sup> | 28 | Age, years, M±SD: 1st group: 27.71; 2nd group: 22.29<br>Female: 42.86%<br>Ethnicity: not reported<br>Mean BMI±SD: not reported<br>Country: not reported | Design: evaluation study<br>Purpose: evaluate mobile phone app usability and understandability using two evaluation groups<br>Length: one (35–50 minute) evaluation session | Mobile app Monsters & Gold uses context-aware, user-adaptive game, combines user heart rate, age, fitness, and exercise phase to motivate user to jog and trains user to exercise at optimal intensity for cardiovascular benefits; mobile phone screen displays virtual trail that advances as the user jogs in real-time; virtual monsters, gold, potions, and shields appear and disappear based on user's jogging speed and heart rate; goal of game is to score "gold points" without losing "health points"; points are gained or lost depending on speeding up jogging pace to reach positive targets (gold, potions, shields) or slowing down to avoid negative obstacles (monsters) along the trails; | Objective: user's position and jogging pace measured by internal phone GPS and physical exertion measured using Bluetooth-enabled pulse oximeter clipped to user's ear<br>Subjective: not applicable | Not reported    | Understandability of the game; usefulness of audio and graphics; influence of the game on motivation to jog | 1. First evaluation group: most users reported they would jog more often and more willingly if they could always use the Monsters & Gold mobile phone game (mean score on a 5-point Likert scale = 3.64 SD=0.63; 1=strongly disagree and 5=strongly agree)<br>2. Second evaluation group: half of the users reported they would jog more often and more willingly if they could always use the Monsters & Gold game (mean score = 3.5, SD=0.94) | Weak          |
| Consolvo (2006) <sup>4</sup> | 13 | Age, years, M±SD: Mean age not                                                                                                                          | Design: quasi-experimental pilot                                                                                                                                            | Mobile phone app called Houston with                                                                                                                                                                                                                                                                                                                                                                                                                                                                                                                                                                                                                                                                           | Objective: pedometer-                                                                                                                                                                                | Not reported    | Percentage of days step count goals                                                                         | 1. Sharing version group more likely to                                                                                                                                                                                                                                                                                                                                                                                                         | Moderate      |

| study                        | N  | Sample characteristics                                                                                                                        | Study characteristics                                                                                                                                               | Mobile technology use                                                                                                                                                                                                                                                                                                                                                                                  | PA measurement                                                                                                                              | Theoretic basis | Main outcomes                                                                                                                                     | Findings                                                                                                                                                                                                                                                                                                                                                               | Study quality |
|------------------------------|----|-----------------------------------------------------------------------------------------------------------------------------------------------|---------------------------------------------------------------------------------------------------------------------------------------------------------------------|--------------------------------------------------------------------------------------------------------------------------------------------------------------------------------------------------------------------------------------------------------------------------------------------------------------------------------------------------------------------------------------------------------|---------------------------------------------------------------------------------------------------------------------------------------------|-----------------|---------------------------------------------------------------------------------------------------------------------------------------------------|------------------------------------------------------------------------------------------------------------------------------------------------------------------------------------------------------------------------------------------------------------------------------------------------------------------------------------------------------------------------|---------------|
|                              |    | reported; range: 28–42<br>Female: 100%<br>Ethnicity: not reported<br>Mean BMI±SD: 22.2 (SD not reported)<br>Country: not reported             | study<br>Purpose: determine features of app that were important, not important, and what was missing; collect information for future work<br>Length: 3 weeks        | journal that displays daily step count, goals, and progress toward goals; app can be used to manually enter step counts, add comments, receive rewards, share messages and step count data with others; encouraged social support: sharing version enabled users to share step counts, goal progress, and messages with peers (all optional); designed to encourage users to increase daily step count | recorded step count<br>Subjective: self-reported step count and other PA recorded in Houston app                                            |                 | were met for sharing versus personal groups                                                                                                       | meet daily step count goals than personal version group ( $p<0.05$ )<br>2. Average daily step counts increased for seven participants from baseline (median 30%; nonsignificant group difference)                                                                                                                                                                      |               |
| Consolvo (2008) <sup>5</sup> | 12 | Age, years, M±SD: Mean age not reported; range: 25–35<br>Female: 50%<br>Ethnicity: not reported<br>Mean BMI±SD: not reported<br>Country: U.S. | Design: quasi-experimental field trial<br>Purpose: Determine UbiFit usability and acceptability; test activity inference vs manual PA journaling<br>Length: 3 weeks | Mobile sensing platform; interactive application; can glance at display to see aesthetic representation of PA goal attainment; app displays a virtual garden that motivates PA by accumulating different flowers and butterflies in response to PA                                                                                                                                                     | Objective: On-body sensors and real-time activity inference<br>Subjective: app journal feature to allow manual corrections of PA inferences | Not reported    | Types of activities UbiFit supports; participant interaction with UbiFit system; participant reaction to activity inference and manual journaling | 1. The UbiFit app supports measurement of a variety of activities<br><br>2. 61% of activities performed were manually journaled by participants, 39% were inferred by UbiFit; 77% of inferred activities were unchanged by participants<br><br>3. Participants reported journal feature was quick and simple to use but wanted the app to automatically log activities | Moderate      |

| study                      | N   | Sample characteristics                                                                                               | Study characteristics                                                                                                                                                                                                                                                      | Mobile technology use                                                                                                                                                                                                                                                                                                                                                                                                                                                                                                                                                                                                                                                                                                                                                                                                                     | PA measurement                                                                                | Theoretic basis                                                                               | Main outcomes                                                                                                                                                          | Findings                                                                                                                                                                                                                  | Study quality |
|----------------------------|-----|----------------------------------------------------------------------------------------------------------------------|----------------------------------------------------------------------------------------------------------------------------------------------------------------------------------------------------------------------------------------------------------------------------|-------------------------------------------------------------------------------------------------------------------------------------------------------------------------------------------------------------------------------------------------------------------------------------------------------------------------------------------------------------------------------------------------------------------------------------------------------------------------------------------------------------------------------------------------------------------------------------------------------------------------------------------------------------------------------------------------------------------------------------------------------------------------------------------------------------------------------------------|-----------------------------------------------------------------------------------------------|-----------------------------------------------------------------------------------------------|------------------------------------------------------------------------------------------------------------------------------------------------------------------------|---------------------------------------------------------------------------------------------------------------------------------------------------------------------------------------------------------------------------|---------------|
| David (2012) <sup>6</sup>  | 71  | Age, years, M±SD: 57±5<br>Female: 100%<br>Ethnicity: white: 93%; other: 7%<br>Mean BMI±SD: 31.5±4.1<br>Country: U.S. | Design: RCT with two arms: walking intervention with personal coach, walking intervention without personal coach<br>Purpose: determine the feasibility of using mobile phones and an IVR system for self-monitoring of walking in postmenopausal women<br>Length: 12 weeks | Use of mobile phones to administer walking intervention using an IVR system and for participants to report daily step counts; participants had two daily interactions with the IVR system, IVR system called participants once/day and asked three questions: whether participant had walked that day or planned to walk that day, participant's self-efficacy to achieve step count goal that day, whether participant was having a good or bad day, IVR system also delivered a message focused on a theme that was the focus for the intervention that week (e.g., self-monitoring, awareness of barriers); participant called IVR system in the evening to report daily step count from pedometer, provide assessment of self-efficacy for walking the following day, and assessment of satisfaction with their walking from that day | Objective: not applicable<br>Subjective: self-reported daily step count measured by pedometer | Goal-setting Theory, Social Cognitive Theory, Problem-solving Theory, Trans-theoretical Model | Change in time taken to complete a 1-mile walk between baseline and post-intervention; anthropometrics; psychometrics; influence of a health coach on walking behavior | 1. Significant decrease in time to complete a 1-mile walk (post-pre intervention time = -0.77 minutes, $p=0.001$ )<br>2. Medium-size effect for improvement in time taken to complete the 1-mile walk (Cohen's $d=0.40$ ) | Moderate      |
| Dunton (2011) <sup>7</sup> | 121 | Age, years, M±SD: 11±1.8                                                                                             | Design: quasi-experimental                                                                                                                                                                                                                                                 | Electronic EMA using mobile phones                                                                                                                                                                                                                                                                                                                                                                                                                                                                                                                                                                                                                                                                                                                                                                                                        | Objective: PA                                                                                 | Not reported                                                                                  | Step count and MVPA minutes within                                                                                                                                     | 1. No significant differences between                                                                                                                                                                                     | Strong        |

| study                     | N  | Sample characteristics                                                                                                                                                            | Study characteristics                                                                                                                                                                                                                                   | Mobile technology use                                                                                                                                                                                                                                                                                                                                                          | PA measurement                                                                                                                                                          | Theoretic basis | Main outcomes                                                                                                                                                                                                                                                                                                                                     | Findings                                                                                                                                                                                                                                                                                                                       | Study quality |
|---------------------------|----|-----------------------------------------------------------------------------------------------------------------------------------------------------------------------------------|---------------------------------------------------------------------------------------------------------------------------------------------------------------------------------------------------------------------------------------------------------|--------------------------------------------------------------------------------------------------------------------------------------------------------------------------------------------------------------------------------------------------------------------------------------------------------------------------------------------------------------------------------|-------------------------------------------------------------------------------------------------------------------------------------------------------------------------|-----------------|---------------------------------------------------------------------------------------------------------------------------------------------------------------------------------------------------------------------------------------------------------------------------------------------------------------------------------------------------|--------------------------------------------------------------------------------------------------------------------------------------------------------------------------------------------------------------------------------------------------------------------------------------------------------------------------------|---------------|
|                           |    | Female: 49%<br>Ethnicity: African-American: 10%; Asian: 12.5%; Hispanic/Latino: 32.5%; white: 23.3%; mixed race: 15.8%; other: 5.8%<br>Mean BMI±SD: Not reported<br>Country: U.S. | Purpose: examine the feasibility, acceptability, and validity of electronic EMA to measure PA and sedentary behaviors in children<br>Length: 4 days                                                                                                     | captured PA and sedentary behavior in real time; use of custom version of MyExperience software on mobile phones to deliver EMA surveys; electronic surveys presented questions about current activity on display of mobile phone three to seven times/day; participants prompted to complete surveys with audio prompts from mobile phones                                    | measured using accelerometer<br>Subjective: current activity reported by participants using electronic EMA surveys, self-reported PA time-matched to accelerometer data |                 | 30 minutes prior to each EMA prompt; Analysis of whether participants were willing to answer EMA prompts during exercise; analysis of whether EMA prompt nonresponse was related to current PA levels; comparison of self-reported activity and accelerometer data to determine if participants answered EMA prompts about PA honestly/accurately | answered and unanswered prompts for step counts or MVPA<br><br>2. Step counts and likelihood of 5 or more minutes of MVPA were significantly higher during activity vs sedentary behavior reported by EMA ( $p<0.001$ )<br><br>3. EMA prompts feasible and acceptable to collect PA data from children as young as 9 years     |               |
| Emken (2012) <sup>8</sup> | 20 | Age, years, M±SD: 14.6±1.8<br>Female: 50%<br>Ethnicity: Hispanic/Latino: 100%<br>Mean BMI±SD: 31.6±6.3; BMI percentile: 95.8±3.7<br>Country: U.S.                                 | Design: quasi-experimental laboratory assessment<br>Purpose: evaluate the accuracy of the KNOWME Networks PA detection system in a laboratory setting using personalized and generalized PA detection models<br>Length: four sessions, 1–1.5 hours each | KNOWME Networks PA detection system, a mobile, wearable body area network, used wireless, Bluetooth-enabled on-body sensors (heart rate monitor and accelerometers) to detect PA states; data from the on-body sensors were communicated to a secure server in real time using the mobile phone app; mobile phone app display showed participant's number of sedentary minutes | Objective: real-time PA detection using the KNOWME Networks suite of sensors and mobile phone app<br>Subjective: not applicable                                         | Not reported    | Accuracy of PA state detection/classification using personalized and generalized PA models                                                                                                                                                                                                                                                        | 1. The KNOWME system had an overall 84% accuracy of PA state detection<br><br>2. The system had some difficulties distinguishing between static and fidgeting sedentary behaviors, but when these behaviors were collapsed, accuracy increased to 94%<br><br>3. Personalized models were more accurate than generalized models | Moderate      |

| study                        | N  | Sample characteristics                                                                                         | Study characteristics                                                                                                                                                                                                                                                   | Mobile technology use                                                                                                                                                                                                                                                                                                                                         | PA measurement                                                                                                                                                                                                              | Theoretic basis         | Main outcomes                                                                                                                                                                                            | Findings                                                                                                                                                                                                                                                                                                                                           | Study quality |
|------------------------------|----|----------------------------------------------------------------------------------------------------------------|-------------------------------------------------------------------------------------------------------------------------------------------------------------------------------------------------------------------------------------------------------------------------|---------------------------------------------------------------------------------------------------------------------------------------------------------------------------------------------------------------------------------------------------------------------------------------------------------------------------------------------------------------|-----------------------------------------------------------------------------------------------------------------------------------------------------------------------------------------------------------------------------|-------------------------|----------------------------------------------------------------------------------------------------------------------------------------------------------------------------------------------------------|----------------------------------------------------------------------------------------------------------------------------------------------------------------------------------------------------------------------------------------------------------------------------------------------------------------------------------------------------|---------------|
| Fjeldsoe (2010) <sup>9</sup> | 88 | Age, years, M±SD: 30±6<br>Female: 100%<br>Ethnicity: not reported<br>Mean BMI±SD: 27±6<br>Country: Australia   | Design: RCT with one intervention and one control group<br>Purpose: assess the efficacy and feasibility of an SMS-based intervention for increasing frequency and duration of PA of postnatal women<br>Length: 12 weeks                                                 | Personally tailored SMS sent three to five times/week; SMS promoted cognitive and behavioral strategies for PA, focused on self-efficacy, goal-setting skills, outcome expectancy, social support, and perceived environmental opportunity for PA; participant-nominated support person received two SMS/week regarding providing support for the participant | Objective: not applicable<br>Subjective: self-reported frequency and duration of sitting, light-intensity, brisk walking, moderate-intensity, and vigorous-intensity PA using the Australian Women's Activity Survey (AWAS) | Social Cognitive Theory | PA frequency (days/week) and duration (minutes/week); number of days per week participant reported at least 30 minutes MVPA or walking (frequency) and total duration (minutes/week) of MVPA and walking | 1. Intervention participants increased PA frequency by 1.82 days/week by 13 weeks ( $p=0.038$ ), and walking for exercise frequency by 1.08 days/week by 13 weeks ( $p=0.02$ )<br>2. Between-group difference in change in MVPA frequency significant between baseline and 6 weeks ( $p=0.003$ ), and between baseline and 13 weeks ( $p=0.0001$ ) | Moderate      |
| Fujiki (2008) <sup>10</sup>  | 10 | Age, years, M±SD: 37.9±7.5<br>Female: 80%<br>Ethnicity: not reported<br>Mean BMI±SD: 30.5±6.4<br>Country: U.S. | Design: pilot study<br>Purpose: use persuasive gaming app called Neat-o-Games to encourage non-exercise activity thermogenesis and activity in the daily routine; assess usability and impact on activity of Neat-o-Games app in free-living context<br>Length: 4 weeks | Mobile phone app Neat-o-Games, consisting of a racing game (Neat-o-Race) and a Sudoku game (Neat-o-Sudoku), runs on the background of the mobile phone; wireless on-body sensors communicate body movements to the mobile phone app, advancing an avatar (caricature of a celebrity) through the Neat-o-Race in real time; users compete                      | Objective: movement measured using on-body accelerometer that communicated activity data to the mobile phone app<br>Subjective: not applicable                                                                              | Not reported            | Participants' physical and behavioral modification; app usability                                                                                                                                        | 1. Many participants sustained elevated activity level throughout the 4-week study (significance not reported)<br>2. All participants completed the usability tasks in the required time; results from the usability tests indicated the app was adequately designed                                                                               | Weak          |

| study                        | N  | Sample characteristics                                                                                                    | Study characteristics                                                                                                                                                                                                                                                 | Mobile technology use                                                                                                                                                                                            | PA measurement                                                                                                                             | Theoretic basis                                            | Main outcomes                                                                                                        | Findings                                                                                                                                                                                                      | Study quality |
|------------------------------|----|---------------------------------------------------------------------------------------------------------------------------|-----------------------------------------------------------------------------------------------------------------------------------------------------------------------------------------------------------------------------------------------------------------------|------------------------------------------------------------------------------------------------------------------------------------------------------------------------------------------------------------------|--------------------------------------------------------------------------------------------------------------------------------------------|------------------------------------------------------------|----------------------------------------------------------------------------------------------------------------------|---------------------------------------------------------------------------------------------------------------------------------------------------------------------------------------------------------------|---------------|
|                              |    |                                                                                                                           |                                                                                                                                                                                                                                                                       | with other users for points gained through physical activity used to advance through the Neat-o-Race game; points can be used for hints to complete the Neat-o-Sudoku game                                       |                                                                                                                                            |                                                            |                                                                                                                      |                                                                                                                                                                                                               |               |
| Fukuoka (2011) <sup>11</sup> | 41 | Age, years, M±SD: 48.4±3.1<br>Female: 100%<br>Ethnicity: 58.5% nonwhite<br>Mean BMI±SD: BMI >30: 58.5%<br>Country: U.S.   | Design: quasi-experimental<br>Purpose: encourage increase of PA in sedentary women; determine compliance with the system and concordance between step count measurement from pedometer and self-reported step count through the mobile phone diary<br>Length: 3 weeks | Mobile phone app called mPED for PA composed of two parts: daily text message prompts and PA diary used to record and self-monitor daily steps, and duration, intensity, and frequency of PA                     | Objective: step counts from pedometer<br>Subjective: self-reported step count and duration, intensity, and frequency of PA                 | Not reported                                               | Self-reported step count and PA; agreement between objectively measured step count and self-reported step count      | 1. Overall self-reported steps increased across 3 weeks ( $p<0.001$ )<br><br>2. There was high agreement between self-reported and objectively measured step count                                            | Moderate      |
| Hurling (2007) <sup>12</sup> | 77 | Age, years, M±SD: 40.4±7.6<br>Female: 66.2%<br>Ethnicity: 98.7% white<br>Mean BMI±SD: 26.3±3.4<br>Country: United Kingdom | Design: RCT, with one intervention group, one control group<br>Purpose: evaluate the impact of automated Internet + mobile phone-based program, with feedback via Internet, on PA<br>Length: 9 weeks                                                                  | Automated text message reminders of scheduled weekly exercise plans; automated texts to provide solutions to perceived PA barriers; optional text message reminders about personalized motivating benefits of PA | Objective: Bluetooth-enabled, wrist-worn, uniaxial accelerometer (Bluetooth Actiwatch)<br>Subjective: self-reported leisure-time PA during | Social psychological theories on automatic goal activation | Change in self-reported and accelerometer-recorded moderate activity; perceived self-control; motivation to exercise | 1. Significant increase over baseline in accelerometer-recorded PA in intervention group compared to control; average increase (over control group) in accelerometer-measured PA was 2 hours, 18 minutes/week | Strong        |

| study                       | N   | Sample characteristics                                                                                                                                                                                 | Study characteristics                                                                                                                                                                                                                                                                                                  | Mobile technology use                                                                                                                                                                                                                                                                                                                                                                                                                                                                                 | PA measurement                                                                                                                                                                                                               | Theoretic basis | Main outcomes                                                                                                                                                                                                                                                                                              | Findings                                                                                                                                                                                                                                                                                                                                                                                                                                              | Study quality |
|-----------------------------|-----|--------------------------------------------------------------------------------------------------------------------------------------------------------------------------------------------------------|------------------------------------------------------------------------------------------------------------------------------------------------------------------------------------------------------------------------------------------------------------------------------------------------------------------------|-------------------------------------------------------------------------------------------------------------------------------------------------------------------------------------------------------------------------------------------------------------------------------------------------------------------------------------------------------------------------------------------------------------------------------------------------------------------------------------------------------|------------------------------------------------------------------------------------------------------------------------------------------------------------------------------------------------------------------------------|-----------------|------------------------------------------------------------------------------------------------------------------------------------------------------------------------------------------------------------------------------------------------------------------------------------------------------------|-------------------------------------------------------------------------------------------------------------------------------------------------------------------------------------------------------------------------------------------------------------------------------------------------------------------------------------------------------------------------------------------------------------------------------------------------------|---------------|
|                             |     |                                                                                                                                                                                                        |                                                                                                                                                                                                                                                                                                                        |                                                                                                                                                                                                                                                                                                                                                                                                                                                                                                       | previous week using IPAQ                                                                                                                                                                                                     |                 |                                                                                                                                                                                                                                                                                                            | ( $p=0.02$ )<br>2. Significant increase over baseline in self-reported leisure-time PA in intervention group compared to control Group 1 ( $p=0.03$ )                                                                                                                                                                                                                                                                                                 |               |
| Kirwan (2012) <sup>13</sup> | 200 | Age, years, M $\pm$ SD: Intervention group: 39.3 $\pm$ 12.8, Matched control group: 40.1 $\pm$ 12.1<br>Female: 48%<br>Ethnicity: not reported<br>Mean BMI $\pm$ SD: not reported<br>Country: Australia | Design: two-arm, matched case-control<br>Purpose: to determine if a newly developed smartphone app would improve the self-monitoring and self-reporting of PA of members of an existing online PA behavior intervention called 10,000 Steps; measure user-reported usefulness and usability of app<br>Length: 3 months | iStepLog mobile app developed for Apple platform; intervention participants ( $n=50$ ) given option to report daily step count, daily minutes of moderate activity, and daily minutes of vigorous activity in iStep app, or continue to record PA on the 10,000 Steps program online Step Log; tracking software integrated into the app allowed researchers to monitor how much time participants spent using app, how often they used app to log PA, and features of the app that were most popular | Objective: N/A<br>Subjective: self-reported daily steps from pedometer, minutes of moderate activity, minutes of vigorous activity using mobile app or online log (intervention group) or online log only (matched controls) | Not reported    | User-reported usability and usefulness of iStep app; total number of steps logged during intervention; total number of days steps were logged during intervention; total number of days steps were logged using iStep app compared to online Step Log; time intervention participants spent using iStepLog | 1. Participants reported high mean overall scores for usefulness and usability<br><br>2. Use of the app was associated with increased likelihood to log >10,000 steps per entry (OR=20.64 (95% CI: 9.19, 46.39))<br><br>3. Mean number of daily steps logged by intervention group=11,140.22 ( $\pm$ 4121.33), which was significantly greater than the mean number of daily steps logged by the control group = 6274.73 ( $\pm$ 2106.11; $p<0.001$ ) | Moderate      |
| Lee (2010) <sup>14</sup>    | 36  | Age, years, M $\pm$ SD: intervention: 28.2; control: 29.5 (SDs not reported)                                                                                                                           | Design: case-control study<br>Purpose: assess effectiveness of SmartDiet app to                                                                                                                                                                                                                                        | SmartDiet Mobile phone app collected and analyzed daily dietary intake and PA levels, app calculated                                                                                                                                                                                                                                                                                                                                                                                                  | Objective: stop-watch function of app recorded                                                                                                                                                                               | Not reported    | Body composition; user satisfaction                                                                                                                                                                                                                                                                        | 1. Fat mass, weight, and BMI decreased significantly in intervention vs control group                                                                                                                                                                                                                                                                                                                                                                 | Weak          |



| study                        | N  | Sample characteristics                                                                                                                   | Study characteristics                                                                                                                                                  | Mobile technology use                                                                                                                                                                                                                                                                                                                                                                                                                                  | PA measurement                                                                                                                                                                    | Theoretic basis             | Main outcomes                                                               | Findings                                                                                                                                                                                                                                                                                                                                                                                                                 | Study quality |
|------------------------------|----|------------------------------------------------------------------------------------------------------------------------------------------|------------------------------------------------------------------------------------------------------------------------------------------------------------------------|--------------------------------------------------------------------------------------------------------------------------------------------------------------------------------------------------------------------------------------------------------------------------------------------------------------------------------------------------------------------------------------------------------------------------------------------------------|-----------------------------------------------------------------------------------------------------------------------------------------------------------------------------------|-----------------------------|-----------------------------------------------------------------------------|--------------------------------------------------------------------------------------------------------------------------------------------------------------------------------------------------------------------------------------------------------------------------------------------------------------------------------------------------------------------------------------------------------------------------|---------------|
|                              |    | Female: % not reported<br>Ethnicity: not reported<br>Mean BMI±SD: intervention: 22.2; control: 22.3 (SDs not reported)<br>Country: Korea | collect/store dietary data, assist weight control; assess user satisfaction with SmartDiet app<br>Length: 6 weeks                                                      | calorie requirements for exercise; two components: Diet Planner to record dietary intake and PA, Diet Game learning tool for dietary intake and PA; avatar on app screen was thin, normal weight, or overweight based on personal dietary and PA data                                                                                                                                                                                                  | PA duration (to calculate calories consumed)<br>Subjective: self-reported PA data could be entered by participant into SmartDiet app                                              |                             |                                                                             | ( $p < 0.05$ )<br><br>2. 58% of participants reported that the SmartDiet app was useful for obtaining diet-related information; 58% of participants reported that the app was easy to use; 50% of participants reported that the app was useful for managing diet                                                                                                                                                        |               |
| Mattila (2008) <sup>15</sup> | 27 | Age, years, M±SD: 39.4±8.1<br>Female: 31%<br>Ethnicity: Not reported<br>Mean BMI±SD: 28.8±2.4<br>Country: Finland                        | Design: quasi-experimental<br>Purpose: usability, usage, and acceptance of the Wellness Diary mobile wellness management app for weight management<br>Length: 3 months | Wellness Diary mobile phone app enables self-observation and reporting of health-related behaviors to support user's health behavior-related decision-making; developed for the Symbian Series 60 mobile phone; functions in conjunction with the calendar app on the phone; user puts self-observations and relevant details into the app; App provides objective feedback in the form of graphs and summaries based on the data reported by the user | Objective: step count uploaded to the Wellness Diary app using an infrared-enabled pedometer<br>Subjective: self-reported PA duration, sport, intensity, distance, and heart rate | Cognitive Behavioral Theory | Number of daily self-observation entries into app, acceptability, usability | 1. The Wellness Diary motivated participants to be more physically active; 66% of participants who did not lose weight were motivated to be more physically active, and 71% of participants who did lose weight were motivated to be more physically active (significance not reported)<br><br>2. 76% of participants reported that the app was easy to learn; 88% of participants reported that the app was easy to use | Moderate      |

| study                           | N   | Sample characteristics                                                                                                                                                    | Study characteristics                                                                                                                                                                                                                                                                                                | Mobile technology use                                                                                                                                                                                                                                                                                                                                                                                                                                              | PA measurement                                                                                                                                                                                                    | Theoretic basis                        | Main outcomes                                                                                                                                                                                                      | Findings                                                                                                                                                                                                                                                                                                                   | Study quality |
|---------------------------------|-----|---------------------------------------------------------------------------------------------------------------------------------------------------------------------------|----------------------------------------------------------------------------------------------------------------------------------------------------------------------------------------------------------------------------------------------------------------------------------------------------------------------|--------------------------------------------------------------------------------------------------------------------------------------------------------------------------------------------------------------------------------------------------------------------------------------------------------------------------------------------------------------------------------------------------------------------------------------------------------------------|-------------------------------------------------------------------------------------------------------------------------------------------------------------------------------------------------------------------|----------------------------------------|--------------------------------------------------------------------------------------------------------------------------------------------------------------------------------------------------------------------|----------------------------------------------------------------------------------------------------------------------------------------------------------------------------------------------------------------------------------------------------------------------------------------------------------------------------|---------------|
| Napolitano (2012) <sup>16</sup> | 52  | Age, years, M±SD: 20.47±2.19<br>Female: 86.5%<br>Ethnicity: white: 57.7%; African-American: 30.8%; Hispanic: 5.8%; other: 5.7%<br>Mean BMI±SD: 31.36±5.3<br>Country: U.S. | Design: RCT with three arms: Facebook only; Facebook plus text messaging and personalized feedback; and waitlist control<br>Purpose: determine the feasibility, acceptability, and efficacy of a weight loss intervention for college students using technology-based intervention implementation<br>Length: 8 weeks | Participants in the Facebook plus text messaging and personalized feedback arm only: received three texts/week that requested participants to send self-monitored weight, caloric intake, and PA data, and received immediate personalized feedback based on the data they reported; received two texts/week about general self-monitoring of diet and PA; received two texts/week that contained tips about self-identified high-risk diet and activity behaviors | Objective: not applicable<br>Subjective: self-reported PA by participants in Facebook plus text-messaging arm; modified Godin Leisure-Time Exercise Questionnaire for strenuous, moderate, mild PA in past 7 days | Not reported                           | Primary: weight loss<br>Secondary: PA behavior, goal-setting, and planning, PA self-efficacy, weight self-efficacy, adapted social support for diet and exercise, engagement/compliance, satisfaction with program | No difference in PA behavior within or between study arms                                                                                                                                                                                                                                                                  | Strong        |
| Prestwich (2010) <sup>17</sup>  | 149 | Age, years, M±SD: 23.4±5.6<br>Female: 63.8%<br>Ethnicity: not reported<br>Mean BMI±SD: not reported<br>Country: United Kingdom                                            | Design: RCT, two intervention arms and one control arm<br>Purpose: determine if a PA intervention using text messages with implementation intention content increased brisk walking<br>Length: 4 weeks                                                                                                               | Implementation intentions paired with SMS used to send brisk walking plan reminders or brisk walking goal reminders to the intervention arms                                                                                                                                                                                                                                                                                                                       | Objective: not applicable<br>Subjective: self-reported walking measured using a subset of the Self-Report Walking and Exercise Tables (SWET) measure                                                              | Gollwitzer's Implementation Intentions | Self-reported PA; measures of implementation intention and goal recall; weight; waist-to-hip ratio                                                                                                                 | 1. Implementation intention + plan reminder vs control and implementation intention + goal reminder vs control conditions increased the number of days they met the PA daily guidelines, through brisk and fast walking, significantly more than the control group ( $p=0.04$ , $p=0.03$ )<br>2. Number of days/week brisk | Strong        |

| study                         | N   | Sample characteristics                                                                                                                                                                                                                                           | Study characteristics                                                                                                                                                                                                                                                                            | Mobile technology use                                                                                                                                                                                                                                                             | PA measurement                                                                                                                                                                          | Theoretic basis                  | Main outcomes                                                                                                                                                                 | Findings                                                                                                                                                                                            | Study quality |
|-------------------------------|-----|------------------------------------------------------------------------------------------------------------------------------------------------------------------------------------------------------------------------------------------------------------------|--------------------------------------------------------------------------------------------------------------------------------------------------------------------------------------------------------------------------------------------------------------------------------------------------|-----------------------------------------------------------------------------------------------------------------------------------------------------------------------------------------------------------------------------------------------------------------------------------|-----------------------------------------------------------------------------------------------------------------------------------------------------------------------------------------|----------------------------------|-------------------------------------------------------------------------------------------------------------------------------------------------------------------------------|-----------------------------------------------------------------------------------------------------------------------------------------------------------------------------------------------------|---------------|
|                               |     |                                                                                                                                                                                                                                                                  |                                                                                                                                                                                                                                                                                                  |                                                                                                                                                                                                                                                                                   |                                                                                                                                                                                         |                                  |                                                                                                                                                                               | walking $\geq 30$ minutes, and number of days exercised including walking in goal reminder and plan reminder groups increased from baseline to follow-up ( $p < 0.001$ )                            |               |
| Shapiro (2008) <sup>18</sup>  | 58  | Age, years, M $\pm$ SD: 8.7 $\pm$ 2.3<br>Female: parents: 91%; children: 62%<br>Ethnicity: white: 60%; African-American: 34%; Asian: 2%; Hispanic/Latino: 2%<br>Mean BMI $\pm$ SD: BMI: 27.0 $\pm$ 6.5; BMI percentile: 94.8 $\pm$ 12.1<br>Country: not reported | Design: RCT; two intervention arms: SMS-based self-monitoring and paper diary-based self-monitoring; no monitoring control arm<br>Purpose: assess the acceptability and efficacy of using SMS messaging to monitor screen time, sugar sweetened beverages, and PA in children<br>Length: 8 weeks | Use of SMS to communicate self-monitoring of health behaviors with targeted feedback; SMS-based self-monitoring arm instructed to send two SMS/day re: behavior goals; immediate automated SMS returned with content based on how many behavior goals met by parents and children | Objective: not applicable<br>Subjective: pedometer to measure step count for parent-child dyads in the two intervention arms; self-report of parent and child step count from pedometer | Cognitive Social Learning Theory | Achievement of behavior changes for parents and children: goal of at least 5000 steps/day, reduction of sugar sweetened beverages to zero/day, reduction in daily screen time | No difference in daily step count between any arms                                                                                                                                                  | Weak          |
| Sirriyeh (2010) <sup>19</sup> | 120 | Age, years, M $\pm$ SD: 17.3 $\pm$ 0.68<br>Female: 70%<br>Ethnicity: not reported<br>Mean BMI $\pm$ SD: not reported<br>Country: United Kingdom                                                                                                                  | Design: RCT; three intervention arms and control arm<br>Purpose: assess the feasibility and efficacy of affective SMS targeting instrumental beliefs, affective beliefs, or both to increase PA in                                                                                               | Daily SMS messages with content aimed at manipulating instrumental beliefs, affective beliefs, or both instrumental and affective beliefs (intervention arms) relating to PA, or neutral SMS message (control)                                                                    | Objective: not applicable<br>Subjective: self-reported 7-day PA recall using IPAQ                                                                                                       | Theory of Planned Behavior       | Self-reported PA behavior change                                                                                                                                              | 1. Significant interaction between intervention arm and current self-reported PA level ( $p = 0.006$ )<br>2. Inactive participants in affective beliefs message arm increased PA significantly more | Moderate      |

| study                          | N       | Sample characteristics                                                                                                                                                                                                       | Study characteristics                                                                                                                                                                               | Mobile technology use                                                                                                                                                                                                                 | PA measurement                                                                                       | Theoretic basis          | Main outcomes                                                                                                                                                                                                      | Findings                                                                                                                                                                                                                                                                                                                                                                                                                                                                                | Study quality |
|--------------------------------|---------|------------------------------------------------------------------------------------------------------------------------------------------------------------------------------------------------------------------------------|-----------------------------------------------------------------------------------------------------------------------------------------------------------------------------------------------------|---------------------------------------------------------------------------------------------------------------------------------------------------------------------------------------------------------------------------------------|------------------------------------------------------------------------------------------------------|--------------------------|--------------------------------------------------------------------------------------------------------------------------------------------------------------------------------------------------------------------|-----------------------------------------------------------------------------------------------------------------------------------------------------------------------------------------------------------------------------------------------------------------------------------------------------------------------------------------------------------------------------------------------------------------------------------------------------------------------------------------|---------------|
|                                |         |                                                                                                                                                                                                                              | adolescents<br>Length: 2 weeks                                                                                                                                                                      |                                                                                                                                                                                                                                       |                                                                                                      |                          |                                                                                                                                                                                                                    | than the instrumental ( $p=0.012$ ); combined ( $p=0.002$ ); and control groups ( $p=0.018$ )                                                                                                                                                                                                                                                                                                                                                                                           |               |
| Spring (2012) <sup>20</sup>    | 204     | Age, years, M $\pm$ SD: 32.8 $\pm$ 11.0<br>Female: 76.5%<br>Ethnicity: white: 53.4%; African-American: 23.0%; Hispanic/Latino: 8.5%; Asian: 11.3%; other: 3.5%<br>Mean BMI $\pm$ SD: 28.3 $\pm$ 7.3<br>Country: not reported | Design: RCT with four intervention groups<br>Purpose: assess optimal combination of diet and PA intervention from four treatments for maintenance of diet and PA behavior change<br>Length: 3 weeks | "Remote coaching" with assistance of mobile decision support technology; use of PDA for self-monitoring of daily dietary intake, MVPA, and sedentary leisure time; communication of time-stamped behavioral data to lifestyle coaches | Objective: accelerometry<br>Subjective: daily self-report minutes of sedentary and physical activity | Behavioral Choice Theory | Overall change in diet (increased fruit/vegetable and decreased saturated fat) and activity (decreased sedentary time and increased physical activity) behaviors using a composite diet-activity improvement score | 1. The treatment group that increased fruits and vegetables and decreased sedentary leisure time had greater improvement than the other treatment groups starting after 1 week of the intervention and continuing throughout the follow-up phase, $p<0.001$<br><br>2. Sedentary leisure time in this group decreased from 219.2 ( $\pm$ 93.8) minutes at baseline to 89.3 ( $\pm$ 65.5) minutes at end of treatment to 125.7 ( $\pm$ 108.7) minutes at the end of the 20-week follow-up | Strong        |
| Sternfeld (2012) <sup>21</sup> | 48; 623 | Age, years, M $\pm$ SD: pilot: 55.6 $\pm$ 5.8; validation: 56.9 $\pm$ 5.7<br>Female: pilot: 52%; validation: 52.5%                                                                                                           | Design: pilot study and subsequent validation study<br>Purpose: compare a mobile phone-based PA diary with traditional                                                                              | Mobile phone-based PA diary, with database of 136 activities and associated MET tasks organized into 15 domains (e.g., work-                                                                                                          | Objective: no objective PA measurement in pilot study; accelero-                                     | Not reported             | Estimated PA, data quality, and user preference of mobile phone-based diary vs paper-based diary; test-retest repeatability of                                                                                     | 1. PA estimates from mobile phone diary and paper diary were similar ( $p=0.49$ for total PA, $p=0.53$ for MVPA)                                                                                                                                                                                                                                                                                                                                                                        | Weak          |

| study                       | N | Sample characteristics                                                                                                                                                                                                            | Study characteristics                                                                                                                                                                                                    | Mobile technology use                                                                                                                                                                                                                                                                                                                                                                                                                                                                                                                                            | PA measurement                                                                                                                                                                                                                       | Theoretic basis                                                                                              | Main outcomes                                                                                                                                     | Findings                                                                                                                                                                                                                                                                                                           | Study quality |
|-----------------------------|---|-----------------------------------------------------------------------------------------------------------------------------------------------------------------------------------------------------------------------------------|--------------------------------------------------------------------------------------------------------------------------------------------------------------------------------------------------------------------------|------------------------------------------------------------------------------------------------------------------------------------------------------------------------------------------------------------------------------------------------------------------------------------------------------------------------------------------------------------------------------------------------------------------------------------------------------------------------------------------------------------------------------------------------------------------|--------------------------------------------------------------------------------------------------------------------------------------------------------------------------------------------------------------------------------------|--------------------------------------------------------------------------------------------------------------|---------------------------------------------------------------------------------------------------------------------------------------------------|--------------------------------------------------------------------------------------------------------------------------------------------------------------------------------------------------------------------------------------------------------------------------------------------------------------------|---------------|
|                             |   | Ethnicity: (pilot) white: 58.3%; African-American: 29.2%; other: 10.4%; (validation) white: 60.6%; African-American: 19.3%; other: 20.7% Mean BMI±SD: Pilot: not reported; validation: men=28.1±5.4, women=30.4±5.9 Country: U.S. | paper-based PA diary and determine the reliability and validity of the mobile phone-based diary Length: pilot: 3 weeks; validation: two periods of 7 days, 6 months apart                                                | related activities, sports, household activities); questions about each activity domain begin with asking if the user has done any activities in the activity domain since the time of the last diary entry; a response of "yes" by the user prompts a list of specific activities in the activity domain; user reports duration and intensity of activity for each activity selected; participants reported activities three times/day and transmitted data wirelessly; if transmission was missed, automated text message reminder was sent to the participant | meter in validation study Subjective: self-reported PA with paper diary and mobile phone-based diary in pilot study; self-reported PA with mobile phone-based diary and retrospective California Mens' Health Study PA questionnaire |                                                                                                              | mobile phone-based diary; validity of PA measurement by mobile phone-based diary vs accelerometer, questionnaires, physical fitness, and body fat | 2. 59.6% of users reported they preferred the mobile phone diary over the paper diary<br><br>3. Intraclass correlations for light and vigorous activity from mobile diary were 0.55 and 0.63, respectively<br><br>4. Correlations between PA estimates from the mobile diary and validation criteria were moderate |               |
| Toscos (2006) <sup>22</sup> | 7 | Age, years, M±SD: 14.7 (SD not reported) Female: 100% Ethnicity: not reported Mean BMI±SD: not reported Country: not reported                                                                                                     | Design: quasi-experimental Purpose: motivate adolescent girls to exercise by increasing their awareness of their activity levels and utilizing their desire to be socially connected to friends and peers Length: 4 days | Chick Clique mobile phone app allowed participants to enter step counts, share activity levels, and compare activity levels with peers; app included food tips tool that provided nutrition information for fast-food chains and calculated step count needed to compensate for consumption of empty calories; SMS                                                                                                                                                                                                                                               | Objective: N/A Subjective: self-reported pedometer data                                                                                                                                                                              | Fogg's functional view of persuasive technology as a tool that persuades by increasing self-efficacy of user | Step count; usability and acceptability of the Chick Clique app                                                                                   | High school participants had more steps using Chick Clique + pedometer than pedometer alone; middle school participants had more steps using the pedometer alone than using Chick Clique + pedometer (significance not reported)                                                                                   | Weak          |

| study | N | Sample characteristics | Study characteristics | Mobile technology use                                                                                                                                                                                                                                                                               | PA measurement | Theoretic basis | Main outcomes | Findings | Study quality |
|-------|---|------------------------|-----------------------|-----------------------------------------------------------------------------------------------------------------------------------------------------------------------------------------------------------------------------------------------------------------------------------------------------|----------------|-----------------|---------------|----------|---------------|
|       |   |                        |                       | messages for participants to communicate PA to peers using the app and to prompt discussion about group exercise plans and goals; automated SMS messages sent indicating group performance and individual fitness level achieved; encouraging messages offering praise for reaching step goals sent |                |                 |               |          |               |

App, application; EE, energy expenditure; EMA, Ecologic Momentary Assessment; IPAQ, International Physical Activity Questionnaire; IVR, interactive voice response; MVPA, moderate-to-vigorous physical activity; PA, physical activity; SMS, short message service

Note: For intervention studies, study quality was assessed as strong if no weak ratings, moderate if one weak rating, and weak if two or more weak ratings for the following study characteristics: selection bias, study design, confounders, blinding, data collection method, withdrawals and dropouts. For non-intervention studies, study quality was assessed as strong if no weak ratings, moderate if one weak rating, and weak if two or more weak ratings for the following study characteristics: selection bias, data collection method, and withdrawals and dropouts.

## References for Appendix A

1. Anderson I, Maitland J, Sherwood S, et al. Shakra: Tracking and sharing daily activity levels with unaugmented mobile phones. *Mobile Networks Appl* 2007;12(2-3):185–99.
2. Bexelius C, Lof M, Sandin S, Lagerros YT, Forsum E, Litton JE. Measures of physical activity using cell phones: validation using criterion methods. *J Med Internet Res* 2010;12(1):e2
3. Buttussi F, Chittaro L. Smarter phones for healthier lifestyles: an adaptive fitness game. *IEEE Pervasive Comput* 2010;9(4):51–7.
4. Consolvo S, Everitt K, Smith I, Landay JA. Design requirements for technologies that encourage physical activity. *CHI Conf Proc (Montréal, Canada)* 2006:457–66.
5. Consolvo S, McDonald D, Toscos T, et al. Activity sensing in the wild: a field trial of UbiFit garden. *CHI Conf Proc* 2008.

6. David P, Buckworth J, Pennell ML, Katz ML, DeGraffinreid CR, Paskett ED. A walking intervention for postmenopausal women using mobile phones and interactive voice response. *J Telemed Telecare* 2012;18(1):20–5.
7. Dunton GF, Liao Y, Intille SS, Spruijt-Metz D, Pentz M. Investigating children's physical activity and sedentary behavior using ecological momentary assessment with mobile phones. *Obesity (Silver Spring)* 2011;19(6):1205–12.
8. Emken BA, Li M, Thatte G, et al. Recognition of physical activities in overweight Hispanic youth using KNOWME Networks. *J Phys Act Health* 2012;9(3):432–41.
9. Fjeldsoe BS, Miller YD, Marshall AL. Mobile mums: a randomized controlled trial of an SMS-based physical activity intervention. *Ann Behav Med* 2010;39(2):101–11.
10. Fujiki Y, Kazakos K, Puri C, Buddharaju P, Pavlidis I, Levine J. NEAT-o-Games: blending physical activity and fun in the daily routine. *Comput Enter (CIE)* 2008;6(2):21.
11. Fukuoka Y, Kamitani E, Dracup K, Jong SS. New insights into compliance with a mobile phone diary and pedometer use in sedentary women. *J Phys Act Health* 2011;8(3):398–403.
12. Hurling R, Catt M, Boni MD, et al. Using internet and mobile phone technology to deliver an automated physical activity program: randomized controlled trial. *J Med Internet Res* 2007;9(2):e7.
13. Kirwan M, Duncan MJ, Vandelanotte C, Mummery WK. Using smartphone technology to monitor physical activity in the 10,000 Steps program: a matched case-control trial. *J Med Internet Res* 2012;14(2):e55.
14. Lee W, Chae YM, Kim S, Ho SH, Choi I. Evaluation of a mobile phone-based diet game for weight control. *J Telemed Telecare* 2010;16(5):270–75.
15. Mattila E, Parkka J, Hermersdorf M, et al. Mobile diary for wellness management, results on usage and usability in two user studies. *IEEE Trans Inf Technol Biomed* 2008;12(4):501–12.
16. Napolitano MA, Hayes S, Bennett GG, Ives AK, Foster GD. Using Facebook and text messaging to deliver a weight loss program to college students. *Obesity (Silver Spring)* 2012; 21(1):25–31.
17. Prestwich A, Perugini M, Hurling R. Can implementation intentions and text messages promote brisk walking? A randomized trial. *Health Psychol* 2010;29(1):40.
18. Shapiro JR, Bauer S, Hamer RM, Kordy H, Ward D, Bulik CM. Use of text messaging for monitoring sugar-sweetened beverages, physical activity, and screen time in children: a pilot study. *J Nutr Educ Behav* 2008;40(6):385–91.
19. Sirriyeh R, Lawton R, Ward J. Physical activity and adolescents: an exploratory randomized controlled trial investigating the influence of affective and instrumental text messages. *Br J Health Psychol* 2010;15(4):825–40.
20. Spring B, Schneider K, McFadden HG, et al. Multiple behavior changes in diet and activity: a randomized controlled trial using mobile technology. *Arch Intern Med* 2012;172(10):789–96.
21. Sternfeld B, Jiang SF, Picchi T, Chasan-Taber L, Ainsworth B, Quesenberry CP, Jr. Evaluation of a cell phone-based physical activity diary. *Med Sci Sports Exerc* 2012;44(3):487–95.
22. Toscos T, Faber A, An S, Gandhi M. Chick clique: persuasive technology to motivate teenage girls to exercise. *CHI Conf Proc*, 2006.
